# Supplementary material for: Enhanced Photocatalytic Degradation of Phenol Using Urchin-Like ZnO Microrod-Reduced Graphene Oxide Composite under Visible-Light Irradiation
Source: Hindawi journal article supplement (doi:10.1155/2021/5551148), 2021-07-24

# Enhanced photocatalytic degradation of phenol using urchin-like ZnO microrods–reduced graphene oxide composite under visible-light irradiation

S. Mary Margaret<sup>1</sup>, Albin John P Paul Winston<sup>1</sup>, S. Muthupandi<sup>1</sup>, P. Shobha<sup>1</sup>, P. Sagayaraj<sup>1\*</sup>

<sup>1</sup> Loyola College (Autonomous), Nungambakkam, Chennai, Tamil Nadu, India.

\*Corresponding author: sagayaraj1962@gmail.com, psagayaraj@hotmail.com

## Graphical Abstract

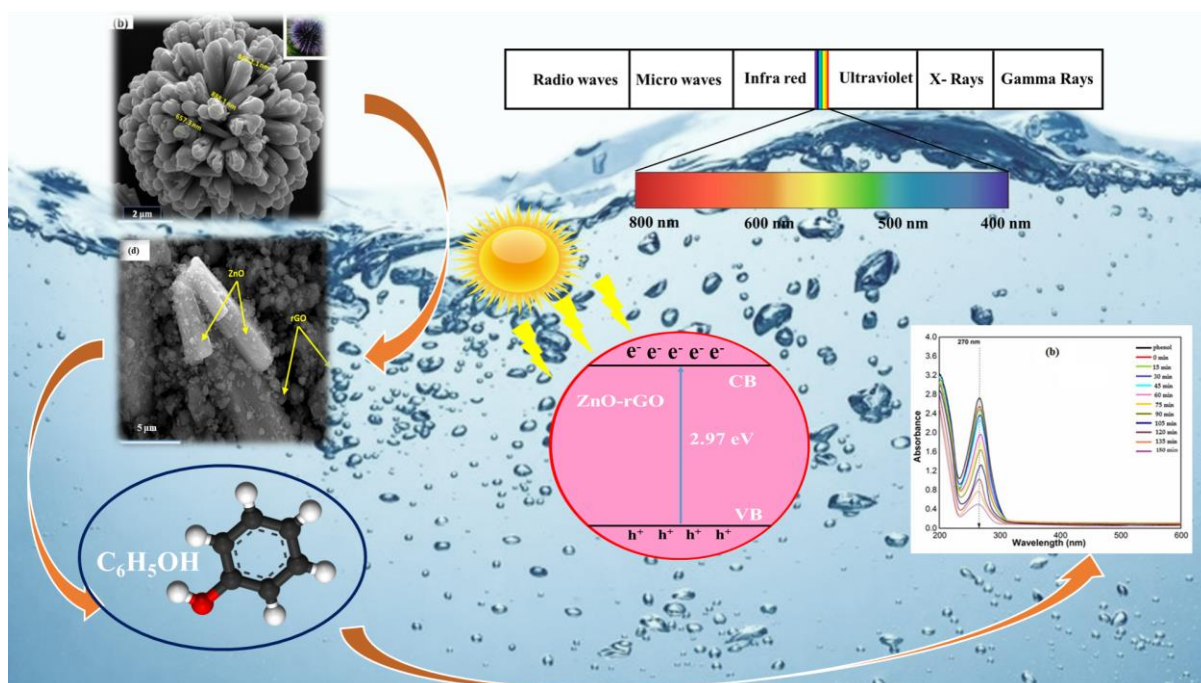

Supplement: f1 [file 5551148.f1.pdf]
